# Supplementary material for: Morphic Sensors for Respiratory Parameters Estimation: Validation against Overnight Polysomnography
Source: MDPI journal article supplement (doi:10.3390/bios13070703), 2023-07-03
Supplement: s1 [file s1]

Bland–Altman plots—respiratory rate (RR) and inter-breath interval (IBI) variability for morphic sensor and polysomnography.

**Bland–Altman Plot— RR for morphic sensor and polysomnography: Unprocessed Data**

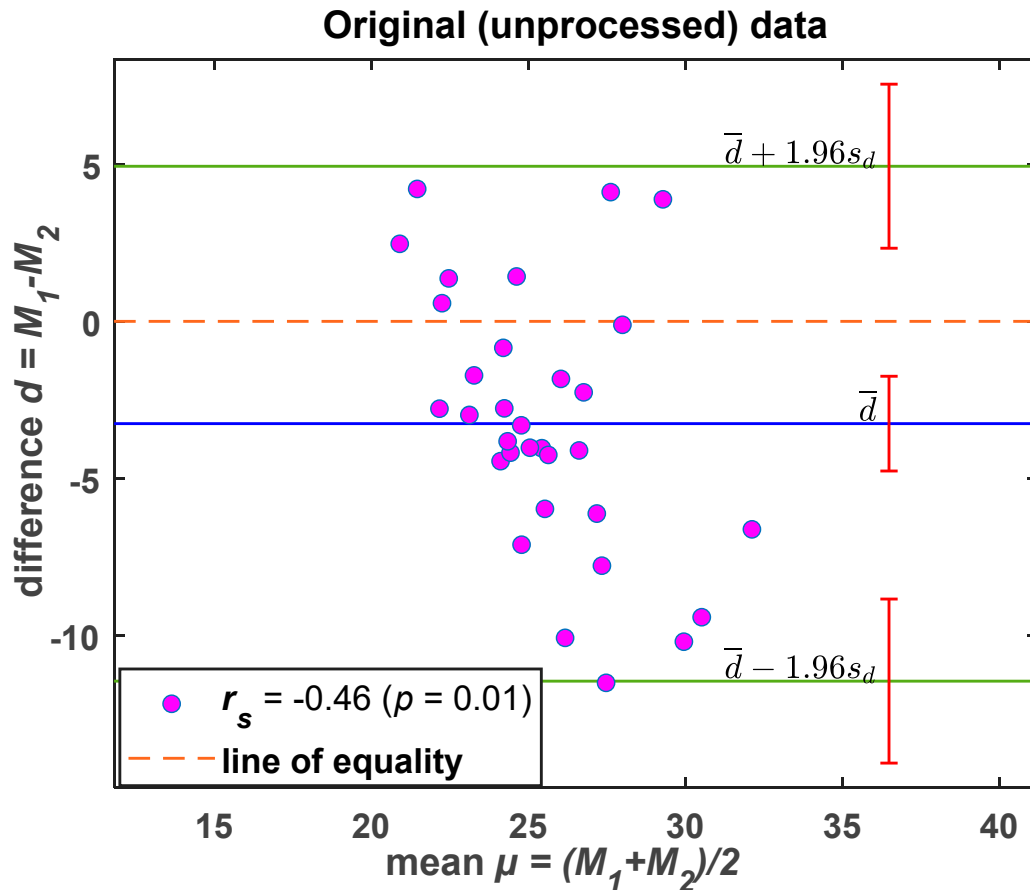

**Figure S1:** Bland–Altman plots—RR. Difference between morphic sensor data and polysomnography airflow breaths/min plotted against the average value of the two methods. Solid horizontal lines indicate mean difference and upper/lower limits of agreement, sd: standard deviation.

**Bland–Altman plot—IBI variability for morphic sensor and polysomnography:**  
**Unprocessed Data**

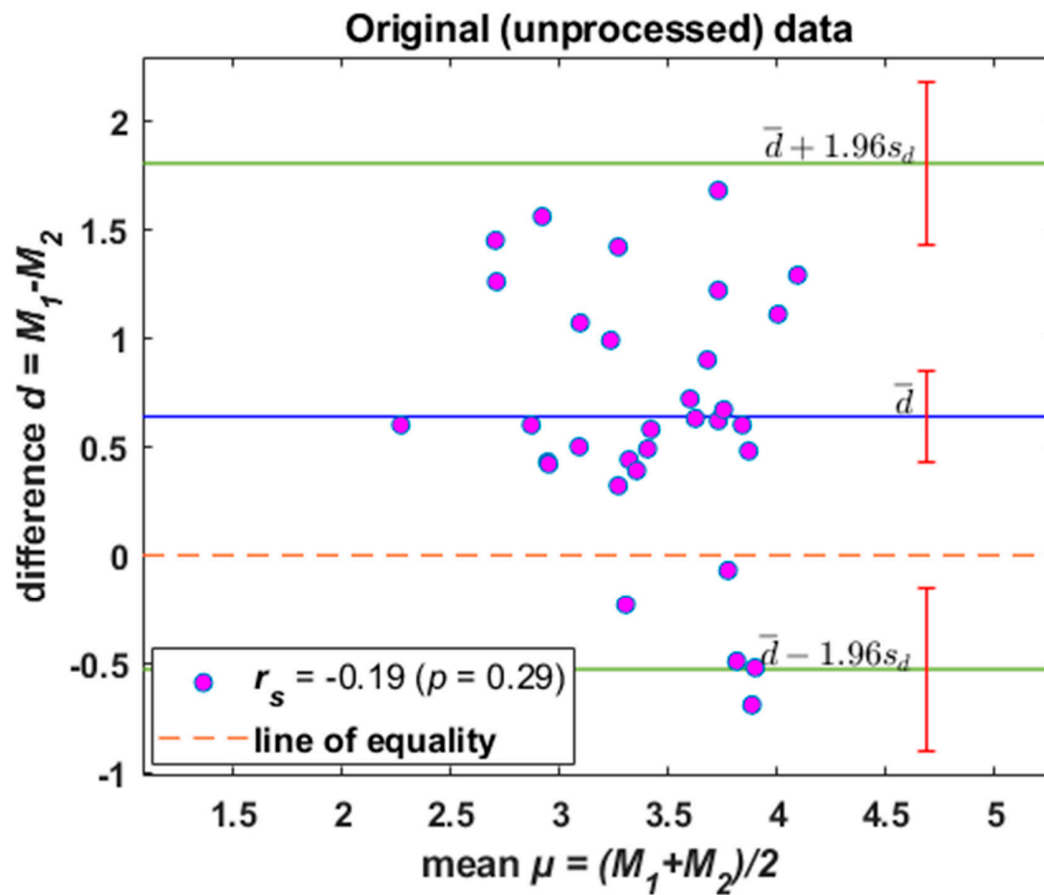

**Figure S2:** Bland–Altman plot—IBI variability. Difference between morphic sensor data and polysomnography airflow breaths/min plotted against the average value of the two methods. Solid horizontal lines indicate mean difference and upper/lower limits of agreement, sd: standard deviation.
